# Supplementary material
Source: MDPI journal article supplement (https://www.mdpi.com/2075-4701/13/10/1677)
Supplement: s1 [file s1]

The semi-empirical relation for metals extraction containing interactions between the existing parameters is defined as follows:

$$\text{Recovery of Copper (\%)} = 98.16791 + 92.94 * [\text{GLY}] - 0.94839 * \text{S/L} - 4.83706 * \text{pH} - 40.3195 * \text{H}_2\text{O}_2 - 46.3501 * [\text{GLY}] * \text{H}_2\text{O}_2 + 8.15275 * \text{pH} * \text{H}_2\text{O}_2 - 40.27973 * [\text{GLY}]^2 + 0.00307692 * \text{S/L}^2 \quad (1)$$

$$\text{Recovery of Zinc (\%)} = 40.76864 + 92.97376 * [\text{GLY}] - 1.08869 * \text{S/L} + 95.033 * \text{H}_2\text{O}_2 - 46.4488 * [\text{GLY}] * \text{H}_2\text{O}_2 - 42.0622 * [\text{GLY}]^2 + 0.003645 * \text{S/L}^2 - 45.95 * \text{H}_2\text{O}_2^2 \quad (2)$$

$$\text{Recovery of Cadmium (\%)} = 60.17453 + 85.1278 * [\text{GLY}] - 0.975375 * \text{S/L} - 5.04142 * \text{pH} + 39.085 * \text{H}_2\text{O}_2 - 0.174766 * [\text{GLY}] * \text{S/L} - 28.1142 * [\text{GLY}] * \text{H}_2\text{O}_2 + 0.046859 * \text{S/L} * \text{pH} - 0.1904 * \text{S/L} * \text{H}_2\text{O}_2 - 19.275 * [\text{GLY}]^2 + 0.002308 * \text{S/L}^2 \quad (3)$$

$$\text{Recovery of Lead (\%)} = 243.24 - 39.386 * [\text{GLY}] - 0.943714 * \text{S/L} - 43.89817 * \text{pH} + 7.33 * [\text{GLY}] * \text{pH} + 0.066310 * \text{S/L} * \text{pH} + 0.001021 * \text{S/L}^2 + 2.06491 * \text{pH}^2 \quad (4)$$

$$\text{Recovery of Tin (\%)} = 104.91353 - 19.30147 * [\text{GLY}] + 1.39876 * \text{S/L} - 39.65141 * \text{pH} + 54.54306 * \text{H}_2\text{O}_2 + 3.86568 * [\text{GLY}] * \text{pH} - 0.143727 * \text{S/L} * \text{pH} - 4.67082 * \text{pH} * \text{H}_2\text{O}_2 - 8.71794 * [\text{GLY}]^2 + 2.88745 * \text{S/L}^2 \quad (5)$$
